# Supplementary material for: Personal life and working conditions of trainees and young specialists in clinical microbiology and infectious diseases in Europe: a questionnaire survey
Source: Springer Nature journal article supplement (doi:10.1007/s10096-017-2937-4), 2017-02-23
Supplement: MOESM1 [file 12089294]

## Online Supplementary File 1

### ESCMID Definition of European Regions

|                                                                                                                                                                                                                                                                                                                                                                                                                                 |                                                                                                                                                                                                                                                                                                                                                                                                            |
|---------------------------------------------------------------------------------------------------------------------------------------------------------------------------------------------------------------------------------------------------------------------------------------------------------------------------------------------------------------------------------------------------------------------------------|------------------------------------------------------------------------------------------------------------------------------------------------------------------------------------------------------------------------------------------------------------------------------------------------------------------------------------------------------------------------------------------------------------|
| <b>Western Europe</b> <ul style="list-style-type: none"><li>• Austria (AT),</li><li>• Belgium (BE)</li><li>• France (FR)</li><li>• Germany (DE)</li><li>• Republic of Ireland (IE)</li><li>• Liechtenstein (LI)</li><li>• Luxembourg (LU)</li><li>• The Netherlands(NL)</li><li>• Switzerland (CH)</li><li>• United Kingdom (UK)</li></ul>                                                                                      | <b>South-Western Europe</b> <ul style="list-style-type: none"><li>• Andorra (AD)</li><li>• Italy (IT)</li><li>• Malta (MT)</li><li>• Monaco (MC)</li><li>• Portugal (PT)</li><li>• San Marino (SM)</li><li>• Spain (ES)</li></ul>                                                                                                                                                                          |
| <b>Northern Europe</b> <ul style="list-style-type: none"><li>• Denmark (DK)</li><li>• Finland (FI)</li><li>• Iceland (IS)</li><li>• Norway (NO)</li><li>• Sweden (SE)</li></ul>                                                                                                                                                                                                                                                 | <b>South-Eastern Europe</b> <ul style="list-style-type: none"><li>• Albania (AL)</li><li>• Bosnia and Herzegovina (BA)</li><li>• Bulgaria (BG)</li><li>• Croatia (HR)</li><li>• Cyprus(CY)</li><li>• Greece (GR)</li><li>• Israel (IL)</li><li>• Kosovo (KVM)</li><li>• Republic of Macedonia (MK)</li><li>• Montenegro (ME)</li><li>• Serbia (RS)</li><li>• Slovenia (SI)</li><li>• Turkey (TR)</li></ul> |
| <b>Eastern Europe</b> <ul style="list-style-type: none"><li>• Armenia (AM)</li><li>• Azerbaijan (AZ)</li><li>• Belarus(BY)</li><li>• Czech Republic (CZ)</li><li>• Estonia (EE)</li><li>• Georgia (GE)</li><li>• Hungary (HU)</li><li>• Latvia (LV)</li><li>• Lithuania (LT)</li><li>• Moldova (MD)</li><li>• Poland (PL)</li><li>• Romania (RO)</li><li>• Russia (RU)</li><li>• Slovakia (SK)</li><li>• Ukraine (UA)</li></ul> |                                                                                                                                                                                                                                                                                                                                                                                                            |
