# Supplementary material for: Personal life and working conditions of trainees and young specialists in clinical microbiology and infectious diseases in Europe: a questionnaire survey
Source: Springer Nature journal article supplement (doi:10.1007/s10096-017-2937-4), 2017-02-23
Supplement: MOESM2 [file 12089294]

## Online Supplementary File 2.

Distribution of living status according to gender and country of work.

| Living Status                                              | Gender (%) |            | Country of work (%) |            |           |
|------------------------------------------------------------|------------|------------|---------------------|------------|-----------|
|                                                            | Males      | Females    | NWE                 | SEE        | EEU       |
| Single                                                     | 41 (26.1)  | 68 (26.3)  | 30 (20.5)           | 64 (27.1)  | 15 (44.1) |
| Involved with someone<br>but not cohabitant nor<br>married | 28 (17.8)  | 29 (11.2)  | 16 (11.0)           | 40 (16.9)  | 1 (2.9)   |
| Married/cohabitant                                         | 88 (56.1)  | 162 (62.5) | 100 (68.5)          | 132 (56.0) | 18 (53.0) |
| Total                                                      | 157        | 259        | 146                 | 216        | 34        |
| p                                                          | 0.147      |            | <b>0.007</b>        |            |           |

NWE: Northern/Western Europe; SEE: Southern/Eastern Europe; EEU: Extra-Europe
