# Supplementary material for: Personal life and working conditions of trainees and young specialists in clinical microbiology and infectious diseases in Europe: a questionnaire survey
Source: Springer Nature journal article supplement (doi:10.1007/s10096-017-2937-4), 2017-02-23
Supplement: MOESM3 [file 12089294]

### Online Supplementary File 3

#### Univariate and multivariate analysis on burnout feelings

|                                     | Gender    |              |                  | Country of work |                   |                  | Workplace |              |                  | Speciality |                   |                  |
|-------------------------------------|-----------|--------------|------------------|-----------------|-------------------|------------------|-----------|--------------|------------------|------------|-------------------|------------------|
| <b>UNIVARIATE ANALYSIS</b>          | F (1,414) | p            | partial $\eta^2$ | F (1,413)       | p                 | partial $\eta^2$ | F (1,414) | p            | partial $\eta^2$ | F (1,412)  | p                 | partial $\eta^2$ |
| <b>Achieving less than deserved</b> | 8.12      | <b>0.004</b> | 0.019            | 14.31           | <b>&lt; 0.001</b> | 0.065            | 8.12      | <b>0.011</b> | 0.019            | 4.54       | <b>0.004</b>      | 0.032            |
| <b>Frustration</b>                  | 0.25      | 0.615        | 0.001            | 8.72            | <b>&lt; 0.001</b> | 0.041            | 8.12      | <b>0.009</b> | 0.019            | 6.16       | <b>&lt; 0.001</b> | 0.043            |
| <b>Feeling unappreciated</b>        | 2.41      | 0.121        | 0.006            | 22.46           | <b>&lt; 0.001</b> | 0.098            | 8.12      | <b>0.016</b> | 0.019            | 2.48       | 0.061             | 0.018            |
| <b>Feeling worn-out</b>             | 8.21      | <b>0.004</b> | 0.019            | 10.70           | <b>&lt; 0.001</b> | 0.054            | 8.12      | <b>0.128</b> | 0.019            | 4.99       | 0.002             | 0.035            |
| <b>MULTIVARIATE ANALYSIS</b>        | F (4,370) | p            | partial $\eta^2$ | F (8,740)       | p                 | partial $\eta^2$ | F (4,370) | p            | partial $\eta^2$ | F (12,979) | p                 | partial $\eta^2$ |
|                                     | 4.60      | <b>0.001</b> | 0.047            | 2.07            | <b>0.037</b>      | 0.022            | 1.14      | 0.339        | 0.012            | 2.01       | <b>0.021</b>      | 0.021            |
